## RESEARCH ARTICLE

## Surface friction alters the agility of a small Australian marsupial

Rebecca Wheatley<sup>1,\*</sup>, Christofer J. Clemente<sup>2</sup>, Amanda C. Niehaus<sup>1</sup>, Diana O. Fisher<sup>1</sup> and Robbie S. Wilson<sup>1</sup>

## ABSTRACT

Movement speed can underpin an animal's probability of success in ecological tasks. Prey often use agility to outmanoeuvre predators; however, faster speeds increase inertia and reduce agility. Agility is also constrained by grip, as the foot must have sufficient friction with the ground to apply the forces required for turning. Consequently, ground surface should affect optimum turning speed. We tested the speed–agility trade-off in buff-footed antechinus (*Antechinus mysticus*) on two different surfaces. Antechinus used slower turning speeds over smaller turning radii on both surfaces, as predicted by the speed–agility trade-off. Slipping was 64% more likely on the low-friction surface, and had a higher probability of occurring the faster the antechinus were running before the turn. However, antechinus compensated for differences in surface friction by using slower pre-turn speeds as their amount of experience on the low-friction surface increased, which consequently reduced their probability of slipping. Conversely, on the high-friction surface, antechinus used faster pre-turn speeds in later trials, which had no effect on their probability of slipping. Overall, antechinus used larger turning radii ( $0.733 \pm 0.062$  versus  $0.576 \pm 0.051$  m) and slower pre-turn ( $1.595 \pm 0.058$  versus  $2.174 \pm 0.050$  m s<sup>-1</sup>) and turning speeds ( $1.649 \pm 0.061$  versus  $2.01 \pm 0.054$  m s<sup>-1</sup>) on the low-friction surface. Our results demonstrate the interactive effect of surface friction and the speed–agility trade-off on speed choice. To predict wild animals' movement speeds, future studies should examine the interactions between biomechanical trade-offs and terrain, and quantify the costs of motor mistakes in different ecological activities.

**KEY WORDS:** Trade-off, Performance, Manoeuvrability, Grip, Movement, Cornering

## INTRODUCTION

An animal's ability to escape from danger is fundamental to its survival. However, until recently, escape performance was mainly studied in the context of top speed, rather than the animal's ability to outrun and outmanoeuvre pursuers (Irschick et al., 2008; Wilson et al., 2015b). In natural situations, prey species do not simply run fast in straight lines, but accelerate, decelerate and turn (Alexander, 1982; Howland, 1974), and these behaviours are constrained by biomechanical trade-offs (Wheatley et al., 2015; Wilson et al., 2015b; Wynn et al., 2015). Faster speeds are associated with reduced accuracy or precision of movement (i.e. the speed versus accuracy trade-off; Fitts, 1992; Jayne et al., 2014), which can cause missteps or slips (Amir Abdul Nasir et al., 2017; Irschick and Losos,

1999; Losos and Sinervo, 1989; Sinervo and Losos, 1991; Wheatley et al., 2015). Faster speeds also increase the inertia required to change direction (i.e. speed versus agility trade-off; Howland, 1974), which constrains the turning radius an animal can use and still remain stable. Prey species may take advantage of these trade-offs to escape from predators that possess faster top speeds than their own (see Wilson et al., 2013a,b).

Yet, escape performance is not simply a matter of biomechanics; wild animals move through environments that vary in complexity, structure and substrate. These factors interact with biomechanical trade-offs to further constrain movement. For example, buff-footed antechinus (*Antechinus mysticus*) and northern quolls (*Dasyurus hallucatus*) both moderate their escape speeds when they run across narrow branches to minimise their risk of slips or falls (Amir Abdul Nasir et al., 2017; Wheatley et al., 2018). Narrow branches offer a smaller target for foot placement, and slower speeds increase the accuracy of footing because speed and accuracy act in opposition to one another.

Ultimately, we expect animals to moderate their speed relative to biomechanical (i.e. speed versus accuracy) and environmental (i.e. branch width) constraints. Substrate is an important environmental factor affecting movement. Coarse or rough surfaces can often increase friction between the foot and the ground, and consequently increase the animal's potential acceleration, deceleration, and straight and angular running speeds (Alexander, 1982; Brandt et al., 2015; Brechue et al., 2005; Höfling et al., 2012). In contrast, smooth, low-friction surfaces reduce the animal's ability to apply the appropriate forces for fast forward or turning movement (van der Tol et al., 2005), and it must slow down to avoid slipping. Friction is so important to animal movement that many species have evolved specialised foot pads or claws to augment their purchase on the ground (Alexander, 2002; Cartmill, 1979). Although studies on lizards recorded faster straight running speeds on substrates that allowed increased friction (Brandt et al., 2015; Höfling et al., 2012; Vanhooydonck et al., 2015), to our knowledge, no studies have compared other performance traits across substrates that vary in surface friction.

We tested how ground substrate affects the trade-off between speed and agility in a small marsupial, the buff-footed antechinus (*Antechinus mysticus*; Baker et al., 2012). Buff-footed antechinus are mouse-sized (20–50 g) insectivorous marsupials (Mutton et al., 2017) that forage on both high- and low-friction surfaces: in leaf litter and bark on the ground, on fallen timber, and on tree trunks including smooth-barked eucalypts (Dickman, 1980; Fisher and Dickman, 1993). They have numerous enlarged, striated pads on their fore- and hind-feet and large claws to assist with grip (Baker et al., 2012). We encouraged antechinus to run and turn on surfaces that differed in their frictional properties, and predicted that they would slip more frequently when attempting to complete sharp turns at higher speeds, and on a smooth, low-friction surface. We demonstrate that, in addition to biomechanical trade-offs between speed and agility, antechinus behaviourally compensate for surface friction by reducing their speed and making wider turns on the low-friction surface.

<sup>1</sup>School of Biological Sciences, University of Queensland, Brisbane, QLD 4072, Australia. <sup>2</sup>School of Science and Engineering, University of the Sunshine Coast, Sippy Downs, QLD 4556 Australia.

\*Author for correspondence (r.wheatley@uq.edu.au)

 R.W., 0000-0001-8302-0370

## MATERIALS AND METHODS

### Animal collection and husbandry

We collected 18 adult female buff-footed antechinus (*Antechinus mysticus*) from the Great Sandy National Park on the Fraser Coast, QLD, Australia, from June to September 2014, in accordance with a permit from the Queensland Government Department of Environment and Heritage Protection (DEHP permit number: WITK14120114). Antechinus were captured in waterproofed (Biopak compostable bags) Elliot traps lined with Dacron fibre and baited with peanut butter, oats and minced beef. All animals were micro-chipped [Trovan Unique ID100A(1.25) Nano Transponder, Keysborough, VIC, Australia] and treated for parasites (animal mite and mange spray, Aristopet, Brisbane, QLD, Australia) before being transported back to Brisbane, where they were housed in custom-built enclosures (3×3×2 m) in groups of three individuals. Each enclosure was fitted with pine bark chip substrate (Nudgee Road Landscape Supplies, Brisbane, QLD, Australia), three wooden nest boxes, three mouse running wheels and a wooden climbing frame. Animals were provided with a constant water source (250 ml inverted drip water bottles, Kazoo, Lidcombe, NSW, Australia), and were fed daily with a mixture of minced meat, crushed dog kibble, egg powder, small animal vitamin drops (Aristopet) and a calcium carbonate powder supplement. This was supplemented with live invertebrates every alternate day. All experiments were performed in accordance with the animal use in research ethics protocol approved by the University of Queensland's Animal Ethics Committee (AEC approval number: SBS/397/13/ARC).

### Cornering performance on two surfaces

Experiments were conducted in a 3×3×2 m outdoor enclosure. Inside the enclosure was a 1.0×0.2×0.6 m runway constructed using medium-density fibreboard walls (9 mm, Customwood, Daiken, New Zealand) and a rough concrete floor. One end of the runway opened out into a 1.5×1.5 m clear arena, with an open, empty Elliot trap in every corner, which the antechinus used as a refuge (Fig. 1). The ground substrate of the arena was either a high-friction (rough concrete) or low-friction (smooth corrugated plastic; white Corflute, Bunnings Warehouse, Brisbane, QLD, Australia) surface. Neither surface was soft enough for the antechinus' claws to puncture or indent. The arena was illuminated using Tobi clamp lamps (Verve design), while the interiors of the track and Elliot traps were dark.

We used mass as the most accurate measure of overall size for all of the animals in our study (mean±s.e.m. 30.95±0.72 g); however, some additional linear measurements of size are provided for a subset of the antechinus in Table S1. Each antechinus had a 2×2 cm marker (a square of masking tape with a 0.5 cm diameter circle drawn in black pen at the centre) affixed to its back to aid in frame-by-frame analyses of video footage. During the trial, an individual antechinus was placed at the closed end of the runway and encouraged to run down the runway into the arena by a researcher shaking a plastic bag behind it. Another researcher stood (immobile) along the wall across from the open end of the runway (Fig. 1) to passively encourage turning. Turning behaviour in the open arena was filmed using a high-speed camera (Casio Exilim EX-FH25, Tokyo, Japan) at 240 frames s<sup>-1</sup> from directly above at the point where the runway met the arena. The dimensions of the resulting videos were 448×336 pixels and 1.35×1.1 m. Each antechinus performed 10 trials on each surface, with a 10 min break between trials to prevent fatigue. Trials where the antechinus did not run continuously were discarded, as were runs where the turning radius exceeded 2 m (as only eight of these turns

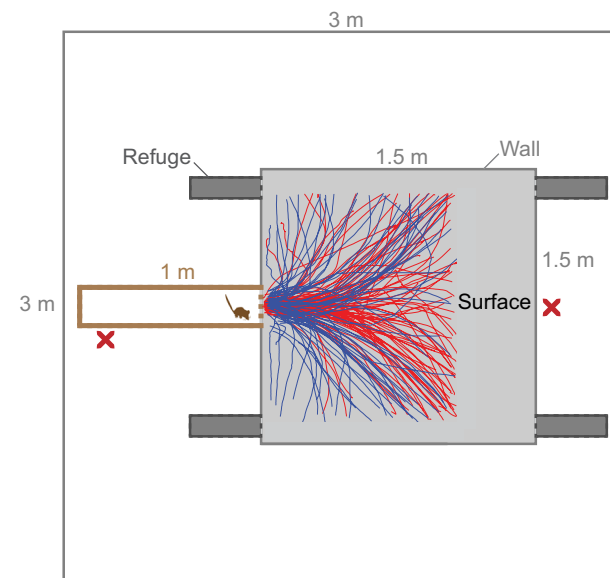

**Fig. 1. Top view of the running track and arena construction showing antechinus' unsmoothed turning paths.** The set-up was contained inside a 3×3×2 m outdoor enclosure. Walls were 0.6 m high and made from 9 mm medium-density fibreboard. The set-up consisted of a 1 m running track with a concrete surface, which opened out into a 1.5×1.5 m illuminated arena (grey area) with an open Elliot trap in each corner. The surface of the arena was either rough concrete (high-friction) or white Corflute (low-friction). An experimenter was positioned at each red cross. Antechinus were filmed from above at the point where the running track opens into the arena. Unsmoothed turning paths within the camera's field of view are shown for the high-friction (red) and low-friction (blue) surfaces.

were made across both surfaces, and for an animal of that size over such a short distance, such 'turns' were essentially straight lines).

Data were extracted from the video footage following a procedure modified from Wynn et al. (2015). The position of the marker on each antechinus' back was tracked into and through the turn (where a turn was defined by a >15 deg change in the antechinus' trajectory) using Tracker video analysing software (version 4.87, Open Source Physics, Boston, MA, USA). These positions were then smoothed by a mean squared error algorithm (tolerance=0.05 error in pixels frame<sup>-1</sup>) using a custom-written script in MATLAB (R2016b, MathWorks, Natick, MA, USA; available upon request from the corresponding author) and the following data extracted: (1) pre-turn speed (m s<sup>-1</sup>), the mean of all instantaneous velocities in the stride immediately preceding the start of the turn, where the change in trajectory was ≤15 deg; (2) turning speed (m s<sup>-1</sup>), the mean of all instantaneous velocities throughout the turn; (3) turning radius (m), determined by a circle fitted to the antechinus' positional data around the turn using the least squares modelling approach outlined in Pratt (1987); and (4) turning angle (deg), the total absolute change in the antechinus' trajectory through the turn. We also quantified both the number of strides within the turn and the number of slips (by counting the number of strides where the antechinus failed to gain purchase on the surface, causing its legs to slip out from under it). From this, we calculated the proportion of turning strides containing a slip for each trial.

To determine how friction limited turning speed, we evaluated eight different friction limit models against turns where no slips occurred on each surface. The minimum coefficient of friction required to execute a turn of a particular radius at a given speed without slipping was estimated by Alexander (1982) as  $\mu = v^2 / rg$ , where  $v$  is the turning speed,  $r$  is the turning radius and  $g$  is

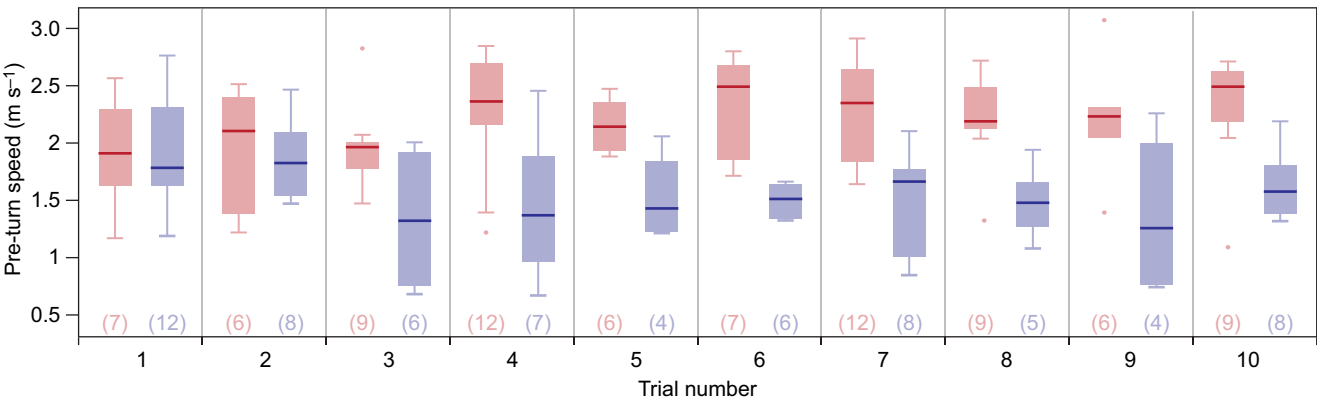

**Fig. 2. Relationship between pre-turn speed and trial number for each surface.** Blue represents the low-friction surface and red represents the high-friction surface. With increasing trial number, antechinus used faster pre-turn speeds on the high-friction surface but slower pre-turn speeds on the low-friction surface. Boxes represent the 1st quartile, median and 3rd quartile, whiskers represent the 95% confidence interval and circles represent outliers. Sample sizes are shown in parentheses beneath each plot.

acceleration due to gravity. Using this equation, we generated eight different potential models for the relationship between turning speed and turning radius up to 0.5 m using friction coefficients of 0.7–1.4. We determined which of these eight models best fitted the experimental data for each surface using the method described in Tan and Wilson (2011). First, the experimental turning speed data for turns  $\leq 0.5$  m in radius where no slips occurred were grouped according to turning radius into categories of 0.05 m (i.e. turning speeds for  $0 < r \leq 0.05$  m, turning speeds for  $0.05 < r \leq 0.1$ , etc.). The 99th turning speed percentile (i.e. the 99% point of the turning speed) was calculated for each data group. Next, we calculated the turning speed values predicted by each friction limit model for the upper turning radius of each category (i.e. 0.05 m, 0.1 m, etc.). The error of each friction limit model was taken as the difference between the 99th turning speed percentiles and the turning speed values predicted by the model, and was expressed as a percentage of the experimental data. The best model was the one with the smallest error, and the friction coefficient from this model was taken as the minimum coefficient of friction for that surface. The correlation between the best model and the 99th turning speed percentiles was calculated using Pearson’s product-moment correlation.

Statistical analyses

Data analyses were conducted in the R statistical software environment v3.4.0 (<https://www.r-project.org/>). A linear mixed effects regression model (LMM) was fitted to the pre-turn speed data using the *nlme* package v3.1.128 (<https://CRAN.R-project.org/package=nlme>) with the effects of surface friction, shelter orientation (backward or forward), mass, trial number and

their two-way interactions as fixed effects and individual as a random effect. Statistically significant correlations were determined using ANOVA, and were used as interaction terms in subsequent models.

LMMs were fitted to determine the effects of surface friction, shelter orientation, mass, trial number, pre-turn speed, turning radius, turning speed, turning angle, the proportion of turning strides with a slip (where a slip did occur), and their various interactions on one another. Where turning radius or turning speed was the response variable, natural log transformations were used on all continuous variables to satisfy the assumption of linearity. The proportion of turning strides with a slip was arcsine square root transformed to satisfy the assumption of normality. Generalized linear mixed effects regression models (GLMMs) with binomial distributions were fitted using the *lme4* package v1.1.0 (Bates et al., 2015) to determine the effects of surface friction, shelter orientation, mass, pre-turn speed, turning radius, turning speed, turning angle and their various interactions on the presence of a slip. In all cases, individual was a random effect. All full models were simplified using conditional model averages through the *MuMIn* package v1.15.6 (<https://CRAN.R-project.org/package=MumIn>), using Akaike weights of  $\geq 0.01$  to subset the model. Near-zero importance models were then removed by fitting a cumulative sum of Akaike weights to  $\leq 0.995$ . Full tables of averaged models are presented in Tables S2–S6.

RESULTS

Antechinus used  $\sim 36\%$  faster pre-turn speeds on the high-friction surface than on the low-friction surface ( $2.174 \pm 0.050$  versus  $1.595 \pm$

Table 1. Full output of model-averaged LMMs predicting ln turning radius (n=151)

| Response: ln turning radius           | Estimate | Standard error | z-value | P-value | Importance |
|---------------------------------------|----------|----------------|---------|---------|------------|
| Intercept                             | −0.951   | 2.363          | 0.402   | 0.687   |            |
| ln Pre-turn speed                     | 1.684    | 0.387          | 4.351   | 1E−5*   | 1.00       |
| Friction                              | 1.405    | 0.466          | 3.012   | 0.003*  | 1.00       |
| Shelter orientation                   | −1.124   | 0.400          | 2.811   | 0.005*  | 1.00       |
| ln Mass                               | −0.333   | 0.727          | 0.458   | 0.647   | 0.49       |
| ln Pre-turn speed×friction            | −0.867   | 0.715          | 1.213   | 0.225   | 0.75       |
| ln Pre-turn speed×shelter orientation | 1.154    | 0.726          | 1.589   | 0.112   | 0.86       |

The full linear mixed effects regression model (LMM) contained ln turning radius as the response variable, ln pre-turn speed, surface friction, shelter orientation, ln mass, trial number, the interactions between ln pre-turn speed and surface friction, ln pre-turn speed and shelter orientation, and surface friction and trial number as fixed effects, and individual as a random effect. All continuous variables were ln transformed to satisfy the assumption of linearity. Only variables present in at least one of the averaged models (importance >0) are reported in the table. Asterisks indicate significance.

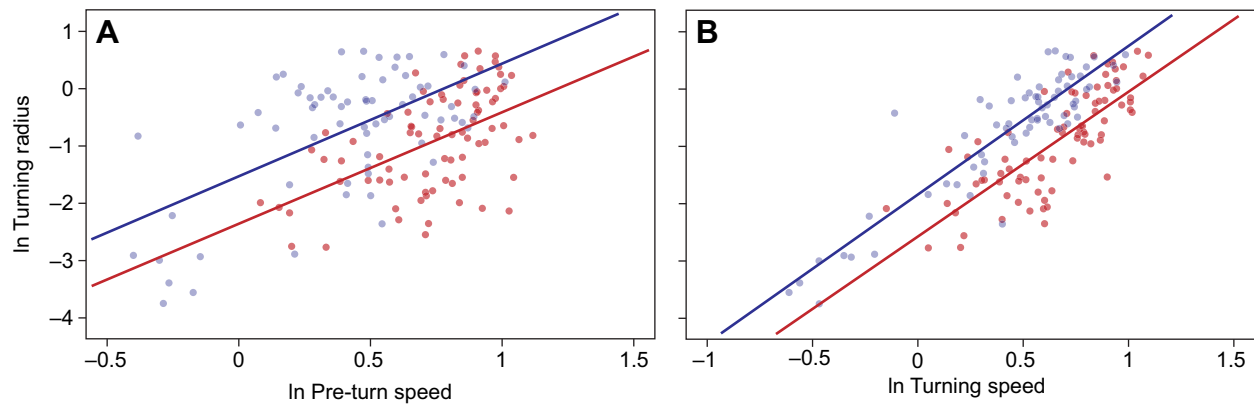

**Fig. 3. Relationship between turning radius and pre-turn and turning speed.** Blue represents the low-friction surface and red represents the high-friction surface. Solid lines represent the linear regression models fitted to the data and circles represent the raw data. Turning radius (m) increased with both pre-turn speed ( $\text{m s}^{-1}$ ; A) and turning speed ( $\text{m s}^{-1}$ ; B).

$0.058 \text{ m s}^{-1}$ ,  $n=151$ ,  $F_{1,129}=72.259$ ,  $P<0.0001$ ); this was because antechinus altered their choice of movement speed with trial number ( $n=151$ ,  $F_{1,129}=7.154$ ,  $P=0.008$ ). Antechinus used faster pre-turn speeds with experience on the high-friction surface ( $n=83$ ,  $F_{1,63}=5.212$ ,  $P=0.026$ ; Fig. 2), but used slower pre-turn speeds with experience on the low-friction surface ( $n=68$ ,  $F_{1,49}=4.795$ ,  $P=0.033$ ; Fig. 2).

Turning radius was positively associated with both pre-turn speed (Table 1, Fig. 3A) and turning speed (Table 2, Fig. 3B). Although the relationship between pre-turn speed and surface friction did not significantly affect turning radius, antechinus turned with greater radii on the low-friction surface ( $0.733\pm 0.062$  versus  $0.576\pm 0.051 \text{ m}$ ; Table 1). Neither pre-turn speed ( $n=151$ ,  $F_{1,16}=3.403$ ,  $P=0.084$ ) nor turning radius (Table 1) was associated with body mass, and turning radius did not change with trial number as trial was not present in any of the averaged models (Table S2).

Antechinus that had faster pre-turn speeds also turned using faster speeds across both surfaces (Table 2). Turning speeds were significantly faster on the high-friction surface ( $2.01\pm 0.054$  versus  $1.649\pm 0.061 \text{ m s}^{-1}$ ; Table 2), and the plateau occurred at a 25% faster speed ( $\sim 2.5$  versus  $2.0 \text{ m s}^{-1}$ ). Turning speed was not associated with body mass (Table 2) or trial number (trial was not present in the averaged models; Table S3).

For the combined data for the two surfaces, antechinus were  $\sim 64\%$  more likely to slip (lose their footing) when turning on the low-friction surface ( $n=151$ ,  $Z=5.269$ ,  $P<0.0001$ ), but this changed depending on the number of trials performed on each surface

( $n=151$ ,  $Z=-2.762$ ,  $P=0.006$ ). Antechinus improved with experience and were less likely to slip in later trials on the low-friction surface ( $n=68$ ,  $Z=-2.752$ ,  $P=0.006$ ; Fig. 4A). However, trial number did not affect the probability of slipping on the high-friction surface ( $n=83$ ,  $Z=1.208$ ,  $P=0.227$ ; Fig. 4A). Slips were more likely at higher pre-turn speeds ( $n=151$ ,  $Z=2.927$ ,  $P=0.003$ ; Fig. 4B), but at slower turning speeds ( $n=151$ ,  $Z=-3.622$ ,  $P<0.0003$ ; Fig. 4C). Slips were not associated with turning angle, turning radius or body mass (turning angle, turning radius and body mass were not present in the only model with a weight of  $>0.01$ ; Table S4).

If the antechinus slipped, they tended to be more likely to slip multiple times during the same trial on the low-friction versus the high-friction surface ( $0.545\pm 0.047$  versus  $0.073\pm 0.022$  turning strides with a slip; Table 3). However, the proportion of strides with a slip during the turn (if they slipped at all) was not associated with turning speed, turning radius, pre-turn speed or trial number (Table 3), or with turning angle or body mass (neither turning angle nor body mass was present in the averaged models; Table S5).

Antechinus turned through greater angles when heading toward the backward-oriented shelters (Table 4). Turning angle was independent of turning speed, turning radius, pre-turn speed, surface friction, mass and trial number (Table 4), and had no effect on the probability of slipping ( $n=151$ ,  $Z=0.868$ ,  $P=0.386$ ) or the proportion of turning strides with a slip (if a slip occurred;  $n=151$ ,  $Z=0.082$ ,  $P=0.935$ ).

**Table 2. Full output of model-averaged LMMs to predict ln turning speed ( $n=151$ )**

| Response: ln turning speed                     | Estimate      | Standard error | z-value | P-value          | Importance |
|------------------------------------------------|---------------|----------------|---------|------------------|------------|
| Intercept                                      | 0.487         | 0.123          | 3.958   | $8\text{E}-6^*$  |            |
| ln Turning radius                              | 0.203         | 0.015          | 13.518  | $2\text{E}-16^*$ | 1.00       |
| ln Pre-turn speed                              | 0.464         | 0.054          | 8.649   | $2\text{E}-16^*$ | 1.00       |
| Friction                                       | -0.104        | 0.036          | 2.898   | $0.004^*$        | 0.97       |
| Shelter orientation                            | $5\text{E}-4$ | 0.009          | 0.051   | 0.959            | 0.04       |
| ln Mass                                        | 0.002         | 0.035          | 0.056   | 0.955            | 0.07       |
| ln Turning radius $\times$ ln pre-turn speed   | -0.002        | 0.010          | 0.187   | 0.851            | 0.05       |
| ln Turning radius $\times$ shelter orientation | $9\text{E}-4$ | 0.008          | 0.112   | 0.911            | 0.01       |
| ln Pre-turn speed $\times$ friction            | 0.004         | 0.026          | 0.169   | 0.866            | 0.07       |

The full model contained ln turning speed as the response variable, ln turning radius, ln pre-turn speed, surface friction, shelter orientation, ln mass, trial number, the interaction between ln turning radius and ln pre-turn speed, ln turning radius and shelter orientation, ln pre-turn speed and surface friction, ln pre-turn speed and shelter orientation, and surface friction and trial number as fixed effects, and individual as a random effect. All continuous variables were ln transformed to satisfy the assumption of linearity. Only variables present in at least one of the averaged models (importance  $>0$ ) are reported in the table. Asterisks indicate significance.



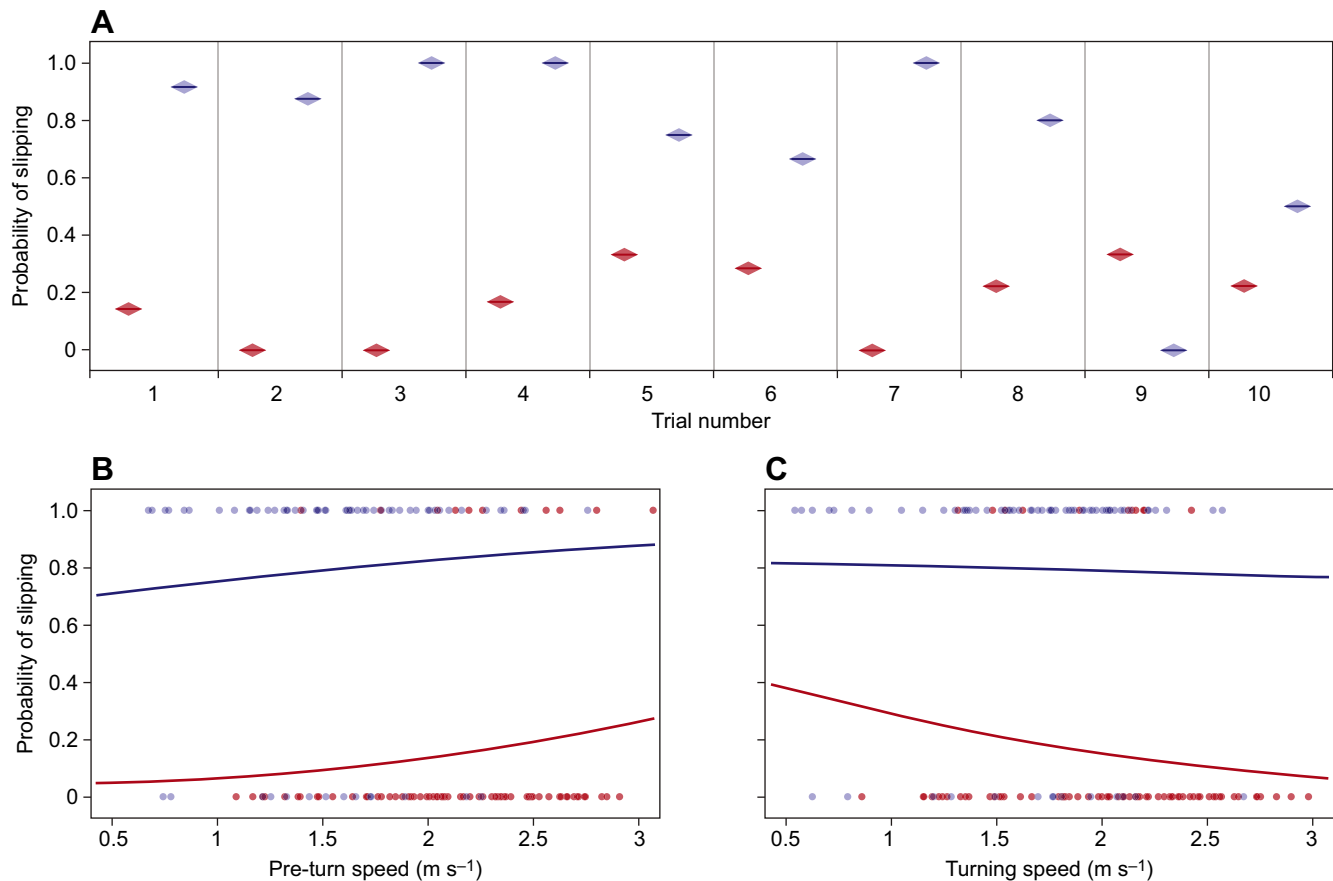

**Fig. 4. Effect of trial number, pre-turn speed and turning speed on the probability of slipping when turning.** Blue represents the low-friction surface ( $n=68$ ) and red represents the high-friction surface ( $n=83$ ). (A) The probability of slipping decreased with trial number on the low-friction surface, but trial number had no effect on the probability of slipping on the high-friction surface. Across trials, slipping when turning was more likely on the low-friction surface, and when the antechinus used higher pre-turning speeds (B) and lower turning speeds (C). Solid lines represent the binomial regression fitted to the data and circles represent the raw data.

Antechinus heading toward the backward-oriented shelters used slower pre-turn speeds ( $n=151$ ,  $F_{1,129}=33.460$ ,  $P<0.0001$ ) and turned with smaller radii ( $n=151$ ,  $Z=2.811$ ,  $P=0.005$ ). Shelter orientation had no effect on turning speed ( $n=151$ ,  $Z=0.058$ ,  $P=0.954$ ), the presence of a slip ( $n=151$ ,  $Z=1.029$ ,  $P=0.304$ ), or the

percentage of turning strides with a slip ( $n=67$ ,  $Z=0.082$ ,  $P=0.935$ ). Seventy-seven percent of turns were toward the forward-oriented shelters while 23% were toward the backward-oriented shelters.

For the high-friction surface, the friction limit model with the lowest error (15.8%) when compared with the real data

**Table 3. Full output of model-averaged LMMs to predict the proportion of strides with a slip during the turn ( $n=151$ )**

| Response: arcsine square root proportion of strides with a slip | Estimate | Standard error | z-value | P-value | Importance |
|-----------------------------------------------------------------|----------|----------------|---------|---------|------------|
| Intercept                                                       | 0.883    | 0.327          | 2.705   | 0.007*  |            |
| Turning speed                                                   | 3E-4     | 0.177          | 0.002   | 0.999   | 0.21       |
| Turning radius                                                  | -0.522   | 0.696          | 0.751   | 0.453   | 1.00       |
| Pre-turn speed                                                  | 0.005    | 0.082          | 0.060   | 0.952   | 0.17       |
| Friction                                                        | 0.507    | 0.295          | 1.719   | 0.086   | 1.00       |
| Shelter orientation                                             | 0.004    | 0.050          | 0.082   | 0.935   | 0.07       |
| Trial                                                           | -8E-4    | 0.006          | 0.135   | 0.892   | 0.02       |
| Turning speed×turning radius                                    | 0.042    | 0.152          | 0.278   | 0.781   | 0.10       |
| Turning speed×friction                                          | 0.015    | 0.168          | 0.090   | 0.928   | 0.04       |
| Turning radius×pre-turn speed                                   | 0.025    | 0.114          | 0.217   | 0.828   | 0.06       |
| Turning radius×friction                                         | -0.072   | 0.595          | 0.121   | 0.904   | 0.35       |
| Turning radius×shelter orientation                              | -0.009   | 0.074          | 0.119   | 0.906   | 0.02       |
| Pre-turn speed×friction                                         | 0.005    | 0.056          | 0.096   | 0.924   | 0.02       |

The full model contained the arcsine square root proportion of strides with a slip as the response variable, turning angle, turning speed, turning radius, pre-turn speed, surface friction, shelter orientation, mass, trial number, and the interaction between turning angle and shelter orientation, turning speed and turning radius, turning speed and pre-turn speed, turning speed and surface friction, turning radius and pre-turn speed, turning radius and surface friction, turning radius and shelter orientation, pre-turn speed and surface friction, pre-turn speed and shelter orientation, and surface friction and trial number as fixed effects, and individual as a random effect. Only variables present in at least one of the averaged models (importance >0) are reported in the table. Asterisks indicate significance.

**Table 4. Full output of model-averaged LMMs predicting turning angle ( $n=151$ )**

| Response: turning angle            | Estimate | Standard error | z-value | P-value | Importance |
|------------------------------------|----------|----------------|---------|---------|------------|
| Intercept                          | 27.214   | 32.962         | 0.826   | 0.409   |            |
| Turning speed                      | 6.759    | 22.596         | 0.299   | 0.765   | 1.00       |
| Turning radius                     | -19.244  | 32.740         | 0.588   | 0.557   | 1.00       |
| Pre-turn speed                     | 13.917   | 16.427         | 0.847   | 0.367   | 1.00       |
| Friction                           | -2.858   | 20.331         | 0.141   | 0.888   | 1.00       |
| Shelter orientation                | 41.414   | 17.375         | 2.383   | 0.017*  | 1.00       |
| Mass                               | 0.059    | 0.275          | 0.215   | 0.830   | 0.23       |
| Trial                              | -0.218   | 0.450          | 0.484   | 0.629   | 0.41       |
| Turning speed×pre-turn speed       | -4.073   | 9.762          | 0.417   | 0.677   | 0.93       |
| Turning speed×turning radius       | -8.391   | 11.195         | 0.750   | 0.454   | 0.96       |
| Turning speed×friction             | -11.262  | 13.792         | 0.817   | 0.414   | 0.98       |
| Turning radius×pre-turn speed      | 8.647    | 16.487         | 0.524   | 0.600   | 0.98       |
| Turning radius×friction            | 17.334   | 12.962         | 1.337   | 0.181   | 1.00       |
| Turning radius×shelter orientation | -11.986  | 11.411         | 1.050   | 0.294   | 0.98       |
| Pre-turn speed×friction            | 5.680    | 10.745         | 0.528   | 0.598   | 0.95       |
| Pre-turn speed×shelter orientation | -10.543  | 9.007          | 1.171   | 0.242   | 0.98       |
| Friction trial                     | 0.069    | 0.408          | 0.168   | 0.867   | 0.15       |

The full model contained turning angle as the response variable, turning speed, turning radius, pre-turn speed, surface friction, shelter orientation, mass, trial number, the interactions between turning speed and pre-turn speed, turning speed and turning radius, turning speed and surface friction, turning radius and pre-turn speed, turning radius and surface friction, turning radius and shelter orientation, pre-turn speed and surface friction, pre-turn speed and shelter orientation, and surface friction and trial number as fixed effects, and individual as a random effect. Only variables present in at least one of the averaged models (importance >0) are reported in the table. Asterisks indicate significance.

had a friction coefficient of 1.3 ( $R=0.595$ ,  $t_7=1.958$ ,  $P=0.091$ ; Table 5, Fig. 5A). For the low-friction surface, the friction limit model with the lowest error (26.3%) assumed a friction coefficient of 0.8 ( $R=-0.337$ ,  $t_1=-0.357$ ,  $P=0.782$ ; Table 5, Fig. 5B).

## DISCUSSION

Antechinus selected movement speeds based on both the biomechanical trade-off between speed and agility and the probability of slipping on surfaces with different frictional properties. Antechinus chose moderate speeds when entering an unfamiliar environment, and then adjusted these speeds over subsequent trials depending on whether the experimental surface was high or low friction. Antechinus used similar pre-turn speeds during the first trials on each surface; however, they employed slower pre-turn speeds on subsequent low-friction trials, which reduced the number of slips they made when turning. Antechinus

were twice as likely to slip when turning on the low-friction surface than on the high-friction surface because – as shown by our friction limit models – their grip on the low-friction surface was nearly half that for the high-friction surface. On the high-friction surface, antechinus used faster pre-turn speeds in later trials, but this did not make them more or less likely to slip when turning.

Lizards run faster on high-friction surfaces (Brandt et al., 2015; Höfling et al., 2012; Vanhooeydonck et al., 2015), but our results suggest that variation in straight-running speeds over different surfaces may be due in part to choices made by the animals rather than biomechanical constraints. The risk and cost of motor mistakes are likely to be important in speed choice, particularly during predator pursuits. Antechinus were 64% more likely to lose their footing on the low-friction surface, but the 36% decrease in speed we observed when antechinus ran onto a low-friction surface may also reduce their ability to escape predators. Antechinus were also more likely to slip when they used faster pre-turn speeds on either surface. This is probably the result of the antechinus attempting to apply forces larger than their friction with the substrate permits, resulting in a slip. In contrast, antechinus appeared less likely to slip when using faster turning speeds. Slipping reduced movement speed considerably, as the antechinus struggled to gain enough purchase to run, so it is probably the presence of slips during a turn that would drag mean turning speed down. Therefore, the negative relationship between turning speed and the probability of slipping may be due to turns that had no slips subsequently having faster mean speeds. Despite being an important cost of high-speed movement, no studies to date have examined slipping or other motor mistakes and their consequences on fitness. However, in order to accurately predict the movement speeds animals choose, we must understand the costs of motor mistakes.

Overall, antechinus used slower turning speeds when making tighter turns, suggesting that the trade-off between speed and agility constrains turning radius (Howland, 1974). Although stability is a strong driver for reducing speed (Full et al., 2002; Ting et al., 1994), the turning speeds of terrestrial animals are constrained by the forces that the limbs can withstand (Wilson et al., 2015a). When turning, these forces are gravity and those associated with centripetal acceleration (Usherwood and Wilson, 2006). The more sharply an

**Table 5. Error for eight different friction limit models for the high-friction ( $n=35$ ) and low-friction surface ( $n=5$ )**

| Coefficient of friction | Error for high-friction surface (% of observed data) | Error for low-friction surface (% of observed data) |
|-------------------------|------------------------------------------------------|-----------------------------------------------------|
| 0.7                     | 32.115                                               | 26.714                                              |
| 0.8                     | 27.497                                               | <b>26.280</b>                                       |
| 0.9                     | 23.159                                               | 28.884                                              |
| 1.0                     | 20.259                                               | 32.232                                              |
| 1.1                     | 18.563                                               | 35.416                                              |
| 1.2                     | 16.943                                               | 38.458                                              |
| 1.3                     | <b>15.817</b>                                        | 41.376                                              |
| 1.4                     | 15.999                                               | 44.183                                              |

Error is the mean difference between the 99th percentile of the observed turning speeds and those predicted by each friction limit model, expressed as a percentage of the observed data. Only turns of radius  $\leq 0.5$  m where no slips were present were assessed. Friction limit models were of the form  $v=\sqrt{(gr\mu)}$ , where  $v$  is the maximum turning speed,  $g$  is the force due to gravity,  $r$  is the turning radius and  $\mu$  is the coefficient of friction. Bold signifies the smallest error for each surface friction (and thus the best-fitting friction coefficient for each surface).

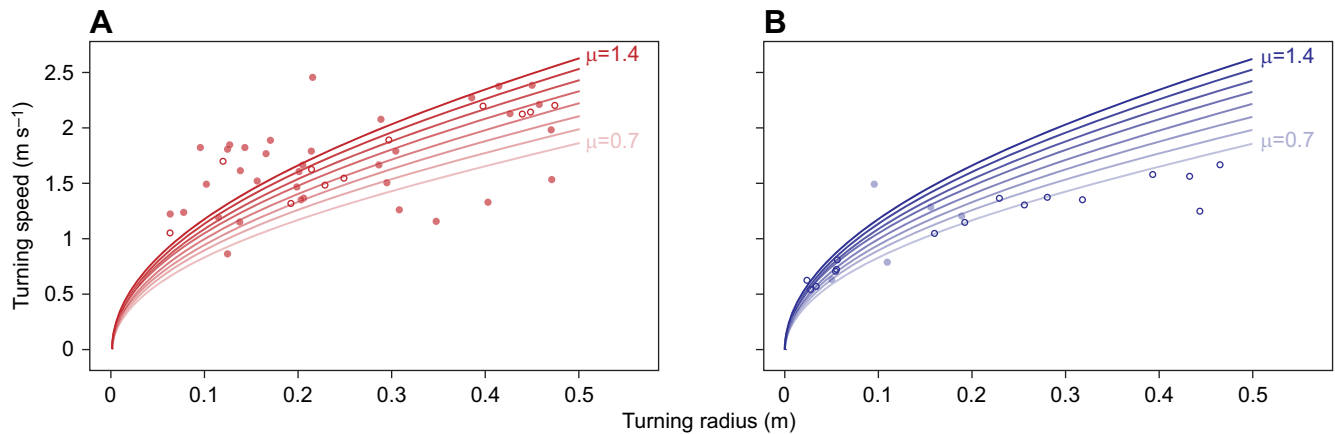

**Fig. 5. Relationship between turning speed and turning radius  $r$ , for  $r \leq 0.5$  m.** Turning radius was significantly correlated with turning speed. Solid lines represent the relationship predicted by the friction limit models, with coefficients ( $\mu$ ) of 0.7, 0.8, 0.9, 1.0, 1.1, 1.2, 1.3 and 1.4 represented by progressively darker shades. Filled circles represent the data points where a slip did not occur and open circles represent the data points where a slip did occur. The best-fitting friction limit models have a friction coefficient of (A) 1.3 for the high-friction surface ( $n=35$ ) and (B) 0.8 for the low-friction surface ( $n=5$ ).

animal turns, the greater the centripetal forces it experiences. Many animals compensate for this by increasing the proportion of the stride where their feet are in contact with the ground (the duty factor) on sharp turns (Chang and Kram, 2007; Greene, 1987; Usherwood and Wilson, 2006; Walter, 2003). This increase in duty factor can decrease movement speed if other stride parameters do not change (Greene and McMahon, 1979). Wild mice (*Mus musculus*) used this mechanism to reduce their speed when making 90 deg turns (Walter, 2003). Consequently, the speed–agility trade-off we observe may be due to a combination of reduced stability and increasing limb forces at higher turning speeds.

Across surfaces, when antechinus used slower pre-turn speeds, they subsequently made tighter, slower turns. However, on the low-friction surface, antechinus tended to use slower pre-turn speeds and make wider turns. Antechinus selected pre-turn speeds based on the expected friction of the surface, but their turning speeds and radii were also constrained by friction. Both our results and the friction limit models predict that agility (or turning radius) should improve with increased friction. However, turning speed at any given turning radius is also constrained by the maximum speed the animal can run. At small turning radii, where animals must use slower speeds to remain stable, speed is primarily limited by friction (Alexander, 2002; Tan and Wilson, 2011). As turning radius increases, speed becomes limited by the force the animal is capable of driving into the ground (Weyand et al., 2000). Thus, agility is only constrained by friction alone at small turning radii, and consequently friction limit models will only provide an accurate estimate of turning speeds at these small radii (Tan and Wilson, 2011). It is also essential to note that increasing surface friction will only improve friction between the foot and the ground (and therefore agility) to a certain extent. Particularly for small species such as antechinus, extremely uneven surfaces will require greater precision of foot placement to avoid tripping, which may in turn require slower movement speeds. The smooth and rough flooring we used in our experiment was intended to encompass natural variation in smoothness of tree bark and rocks these semi-arboreal animals would experience in the wild (Dickman, 1980; Fisher and Dickman, 1993), but future studies could expand our work by using natural surfaces.

We have assumed that turning ability is constrained by friction at every point during the turn. However, antechinus employed a

bounding quadrupedal gait on both surfaces across all trials and, consequently, there was a phase during each stride where no feet were in contact with the substrate. Our antechinus had relatively long tails proportional to body length ( $83.80 \pm 1.17$  versus  $64.09 \pm 1.02$  mm), and were observed swinging their tails considerably during turns. Kangaroo rats (*Dipodomys* spp.) can turn while their feet are off the ground by rapidly moving their tail (Bartholomew and Caswell, 1951). Using a similar method, antechinus may be able to turn during the stride phase when their feet are not in contact with the substrate, thus overcoming the limitations to speed imposed by friction. This may explain why 51% and 40% of the turns were faster than those predicted by the best friction limit models on the high- and low-friction surfaces. However, because of the limited number of turns where no slips occurred, particularly on the low-friction surface, the predicted turning speed values from the best friction limit models are not significantly correlated with the real turning speed data. Consequently, our estimates for the coefficient of friction on each surface are highly approximate.

Our study supports a growing body of evidence showing that animals select running speed based on biomechanical trade-offs (Amir Abdul Nasir et al., 2017; Losos and Sinervo, 1989; Sinervo and Losos, 1991; Wilson et al., 2013a; Wheatley et al., 2018; Wynn et al., 2015) and the terrain over which they are moving (Amir Abdul Nasir et al., 2017; Losos and Sinervo, 1989; Sinervo and Losos, 1991; Vanhooydonck et al., 2015; Wheatley et al., 2018). It is important that researchers both consider and report on the surface structure and friction in their studies, and because the effects of friction will differ among species with different kinds of feet (Höfling et al., 2012), a metric of friction that pairs species and substrate would be ideal. This could be something as simple as the coefficient of friction estimated from friction limit models. Antechinus also modified their speed depending on how likely they were to slip across surfaces. Future research should work toward quantifying the costs of motor mistakes such as slipping in different ecological activities (such as foraging or escaping from a predator) or habitats. Understanding the combined effects of biomechanical trade-offs, terrain and the probability of mistakes on fitness is essential to predicting animal movement speeds in the wild.

#### Acknowledgements

This work would not have been possible without our many undergraduate students and volunteers, who assisted with antechinus trapping and husbandry. We would

also like to thank Thomas Mutton and Andrew Baker for genetically confirming the study species, Daniella Parra for providing advice regarding trapping and husbandry, Maya Maia and Nora Allen for their help with data collection, Simon Blomberg for his advice on our statistical analyses, Gwendolyn David for helping construct our figures, and two anonymous reviewers for their detailed and thoughtful suggestions.

### Competing interests

The authors declare no competing or financial interests.

### Author contributions

Conceptualization: R.W., C.J.C., A.C.N., D.O.F., R.S.W.; Methodology: R.W., C.J.C., A.C.N., D.O.F., R.S.W.; Software: C.J.C.; Validation: R.W.; Formal analysis: R.W., C.J.C., R.S.W.; Investigation: R.W.; Resources: A.C.N., D.O.F., R.S.W.; Writing - original draft: R.W.; Writing - review & editing: R.W., C.J.C., A.C.N., D.O.F., R.S.W.; Visualization: R.W.; Supervision: D.O.F., R.S.W.; Project administration: R.S.W.; Funding acquisition: R.W., A.C.N., D.O.F., R.S.W.

### Funding

This work was supported by the Australian Research Council [DE130101410 to A.C.N., DP150100198 to R.S.W. and D.O.F., FT150100492 to R.S.W.], the Holsworth Wildlife Research Endowment to R.W., and the Ecological Society of Australia to R.W.

### Supplementary information

Supplementary information available online at <http://jeb.biologists.org/lookup/doi/10.1242/jeb.172544.supplemental>

### References

- Alexander, R. M. (1982). *Locomotion of Animals*. Glasgow: Blackie.
- Alexander, R. M. (2002). Stability and manoeuvrability of terrestrial vertebrates. *Integr. Comp. Biol.* **42**, 158-164.
- Amir Abdul Nasir, A. F., Clemente, C. J., Wynn, M. L. and Wilson, R. S. (2017). Optimal running speeds when there is a trade-off between speed and the probability of mistakes. *Funct. Ecol.* **31**, 1941-1949.
- Baker, A. M., Mutton, T. Y. and Van Dyck, S. (2012). A new dasyurid marsupial from eastern Queensland, Australia: the buff-footed antechinus, *Antechinus mysticus* sp. nov. (Marsupialia: Dasyuridae). *Zootaxa* **3515**, 1-37.
- Bartholomew, G. A. and Caswell, H. H. (1951). Locomotion in kangaroo rats and its adaptive significance. *J. Mamm.* **32**, 155-169.
- Bates, D., Mächler, M., Bolker, B. and Walker, S. (2015). Fitting linear mixed-effects models using lme4. *J. Stat. Softw.* **67**, 1-48.
- Brandt, R., Galvani, F. and Kohlsdorf, T. (2015). Sprint performance of a generalist lizard running on different substrates: grip matters. *J. Zool.* **297**, 15-21.
- Brechue, W. F., Mayhew, J. L. and Piper, F. C. (2005). Equipment and running surface alter sprint performance of college football players. *J. Strength Cond Res.* **19**, 821-825.
- Cartmill, M. (1979). The volar skin of primates: its frictional characteristics and their functional significance. *Am. J. Phys. Anthropol.* **50**, 497-510.
- Chang, Y.-H. and Kram, R. (2007). Limitations to maximum running speed on flat curves. *J. Exp. Biol.* **210**, 971-982.
- Dickman, C. (1980). Ecological studies of *Antechinus stuartii* and *Antechinus flavipes* (Marsupialia: Dasyuridae) in open-forest and woodland habitats. *Aust. Zool.* **20**, 433-446.
- Fisher, D. O. and Dickman, C. R. (1993). Body size-prey relationships in insectivorous marsupials: tests of three hypotheses. *Ecology* **74**, 1871-1883.
- Fitts, P. M. (1992). The information capacity of the human motor system in controlling the amplitude of movement (reprinted from Journal of Experimental Psychology, vol 47, pg 381-391, 1954). *J. Exp. Psychol. Gen.* **121**, 262-269.
- Full, R. J., Kubow, T., Schmitt, J., Holmes, P. and Koditschek, D. (2002). Quantifying dynamic stability and maneuverability in legged locomotion. *Integr. Comp. Biol.* **42**, 149-157.
- Greene, P. R. (1987). Sprinting with banked turns. *J. Biomech.* **20**, 667-680.
- Greene, P. R. and McMahon, T. A. (1979). Running in circles. *Physiologist* **22**, S35-S36.
- Höfling, E., Renous, S., Curcio, F. F., Eterovic, A. and Santos Filho, P. D. S. (2012). Effects of surface roughness on the locomotion of a long-tailed lizard, *Colobodactylus taunayi* Amaral, 1933 (Gymnophthalmidae: Heterodactylini). *Int. J. Zool.* **2012**, 627470.
- Howland, H. C. (1974). Optimal strategies for predator avoidance: the relative importance of speed and manoeuvrability. *J. Theor. Biol.* **47**, 333-350.
- Irschick, D. J. and Losos, J. B. (1999). Do lizards avoid habitats in which performance is submaximal? The relationship between sprinting capabilities and structural habitat use in Caribbean anoles. *Am. Nat.* **154**, 293-305.
- Irschick, D. J., Meyers, J. J., Husak, J. F. and Le Galliard, J. F. (2008). How does selection operate on whole-organism functional performance capacities? A review and synthesis. *Evol. Ecol. Res.* **10**, 177-196.
- Jayne, B. C., Lehmkühl, A. M. and Riley, M. A. (2014). Hit or miss: branch structure affects perch choice, behaviour, distance and accuracy of brown tree snakes bridging gaps. *Anim. Behav.* **88**, 233-241.
- Losos, J. B. and Sinervo, B. (1989). The effects of morphology and perch diameter on sprint performance of *Anolis* lizards. *J. Exp. Biol.* **145**, 23-30.
- Mutton, T. Y., Gray, E. L., Fuller, S. J. and Baker, A. M. (2017). Life history, breeding biology and movement in a new species of carnivorous marsupial, the buff-footed antechinus (*Antechinus mysticus*) and a sympatric congener, the subtropical antechinus (*Antechinus subtropicus*). *Mamm. Res.* **62**, 373-385.
- Pratt, V. (1987). Direct least-squares fitting of algebraic surfaces. *ACM SIGGRAPH Comput. Graph.* **21**, 145-152.
- Sinervo, B. and Losos, J. B. (1991). Walking the tight rope: arboreal sprint performance among *Sceloporus occidentalis* lizard populations. *Ecology* **72**, 1225-1233.
- Tan, H. L. and Wilson, A. M. (2011). Grip and limb force limits to turning performance in competition horses. *Proc. R. Soc. B Biol. Sci.* **278**, 2105-2111.
- Ting, L. H., Blickhan, R. and Full, R. J. (1994). Dynamic and static stability in hexapedal runners. *J. Exp. Biol.* **197**, 251-269.
- Usherwood, J. R. and Wilson, A. M. (2006). Accounting for elite indoor 200 m sprint results. *Biol. Lett.* **2**, 47-50.
- van der Tol, P. P. J., Metz, J. H. M., Noordhuizen-Stassen, E. N., Back, W., Braam, C. R. and Weijs, W. A. (2005). Frictional forces required for unrestrained locomotion in dairy cattle. *J. Dairy Sci.* **88**, 615-624.
- Vanhooydonck, B., Measey, J., Edwards, S., Makhubo, B., Tolley, K. A. and Herrel, A. (2015). The effects of substratum on locomotor performance in lacertid lizards. *Biol. J. Linn. Soc.* **115**, 869-881.
- Walter, R. M. (2003). Kinematics of 90° running turns in wild mice. *J. Exp. Biol.* **206**, 1739-1749.
- Weyand, P. G., Sternlight, D. B., Bellizzi, M. J. and Wright, S. (2000). Faster top running speeds are achieved with greater ground forces not more rapid leg movements. *J. Appl. Physiol.* **89**, 1991-1999.
- Wheatley, R., Angilletta, M. J., Jr, Niehaus, A. C. and Wilson, R. S. (2015). How fast should an animal run when escaping? An optimality model based on the trade-off between speed and accuracy. *Integr. Comp. Biol.* **55**, 1166-1175.
- Wheatley, R., Niehaus, A. C., Fisher, D. O. and Wilson, R. S. (2018). Ecological context and the probability of mistakes underlie speed choice. *Funct. Ecol.* **32**, 990-1000.
- Wilson, A. M., Lowe, J. C., Roskilly, K., Hudson, P. E., Golabek, K. A. and McNutt, J. W. (2013a). Locomotion dynamics of hunting in wild cheetahs. *Nature* **498**, 185-189.
- Wilson, J. W., Mills, M. G. L., Wilson, R. P., Peters, G., Mills, M. E. J., Speakman, J. R., Durant, S. M., Bennett, N. C., Marks, N. J. and Scantlebury, M. (2013b). Cheetahs, *Acinonyx jubatus*, balance turn capacity with pace when chasing prey. *Biol. Lett.* **9**, 20130620.
- Wilson, R. P., Griffiths, I. W., Mills, M. G. L., Carbone, C., Wilson, J. W. and Scantlebury, D. M. (2015a). Mass enhances speed but diminishes turn capacity in terrestrial pursuit predators. *eLife* **4**, e06487.
- Wilson, R. S., Husak, J. F., Halsey, L. G. and Clemente, C. J. (2015b). Predicting the movement speeds of animals in natural environments. *Integr. Comp. Biol.* **55**, 1125-1141.
- Wynn, M. L., Clemente, C., Nasir, A. F. A. and Wilson, R. S. (2015). Running faster causes disaster: trade-offs between speed, manoeuvrability and motor control when running around corners in northern quolls (*Dasyurus hallucatus*). *J. Exp. Biol.* **218**, 433-439.
